# Supplementary material for: SFRP4 drives invasion in gastric cancer and is an early predictor of recurrence
Source: PubMed Central journal article supplement (PMC8064978; doi:10.1007/s10120-020-01143-8), 2020-12-04
Supplement: 10120_2020_1143_MOESM1_ESM.pdf [file 10120_2020_1143_MOESM1_ESM.pdf]

# SUPPLEMENTARY FILES

## Journal: Gastric Cancer

### **SFRP4 drives invasion in gastric cancer and is an early predictor of recurrence**

Rita A. Busuttil<sup>1,2,3</sup>, Joshy George<sup>4</sup>, Colin M. House<sup>1</sup>, Stephen Lade<sup>5</sup>, Catherine Mitchell<sup>5</sup>, Natasha S. Di Costanzo<sup>1</sup>, Sharon Pattison<sup>6</sup>, Yu-Kuan Huang<sup>1,2,3</sup>, Patrick Tan<sup>7,8</sup>, Jae-Ho Cheong<sup>9,10</sup>, Sun Young Rha<sup>11</sup> & Alex Boussioutas<sup>1,2,3</sup>

<sup>1</sup> Upper Gastrointestinal Translational Research Laboratory, Peter MacCallum Cancer Centre, Parkville, Victoria, Australia

<sup>2</sup> Sir Peter MacCallum Department of Oncology, The University of Melbourne, Parkville, Victoria, Australia

<sup>3</sup> Department of Medicine, The University of Melbourne, Parkville, Victoria, Australia

<sup>4</sup> Computational Sciences, Jackson Laboratory for Genomic Medicine, Farmington, Connecticut USA

<sup>5</sup> Department of Pathology, Peter MacCallum Cancer Centre, East Melbourne, Victoria, Australia

<sup>6</sup> Department of Medicine, University of Otago, Dunedin, New Zealand

<sup>7</sup> Genome Institute of Singapore, Singapore.

<sup>8</sup> Cancer Science Institute of Singapore, Yong Loo Lin School of Medicine, National University of Singapore, Singapore

<sup>9</sup> Department of Surgery, Yonsei University College of Medicine, Seoul, Republic of Korea

<sup>10</sup> Department of Biomedical Systems Informatics, Yonsei University College of Medicine, Seoul, Republic of Korea

<sup>11</sup> Division of Medical Oncology, Yonsei Cancer Center, Yonsei University College of Medicine, Seoul, Republic of Korea.

Corresponding author info: Professor Alex Boussioutas, Peter MacCallum Cancer Centre, 305 Grattan St, Parkville Telephone: +61 3 98559 7031, Fax: +61 3 8559 5489, Email: [alex.boussioutas@petermac.org](mailto:alex.boussioutas@petermac.org)



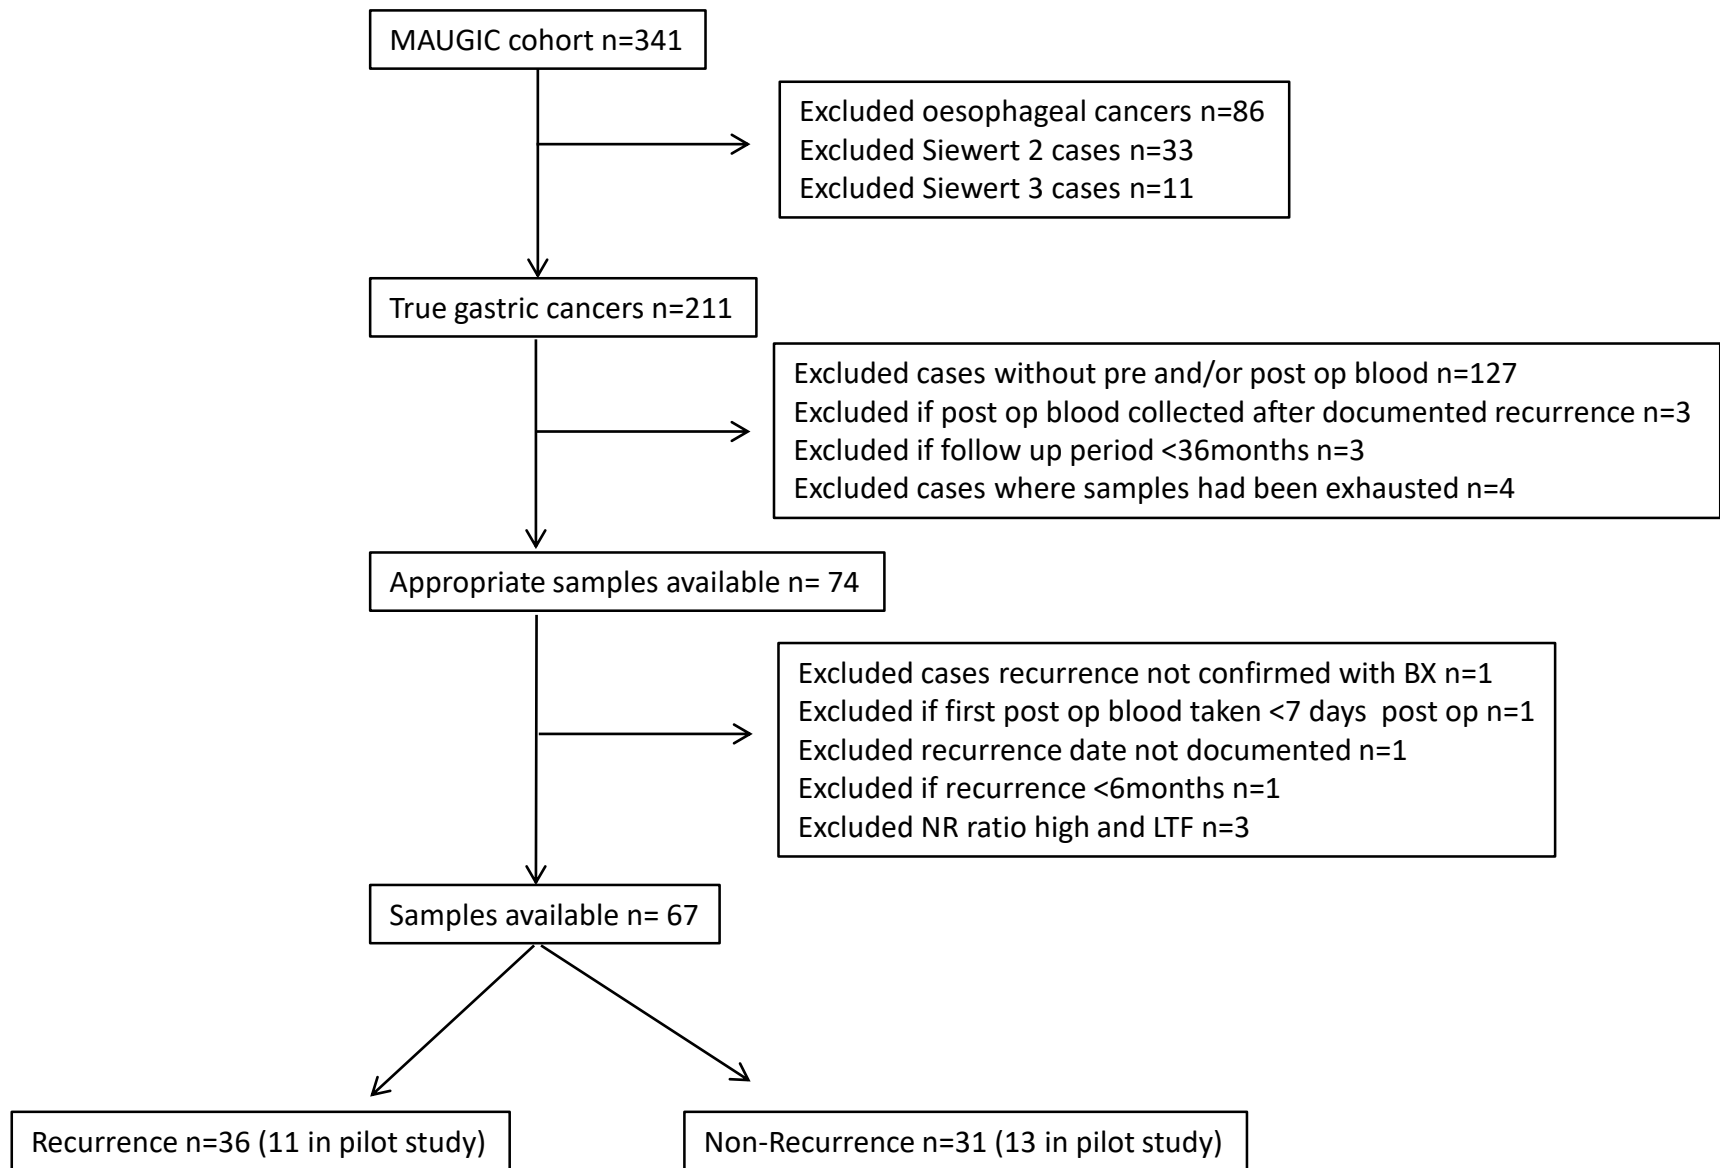

Figure S1. Consort diagram for the selection of gastric cancer plasma samples for SFRP4 ELISA.

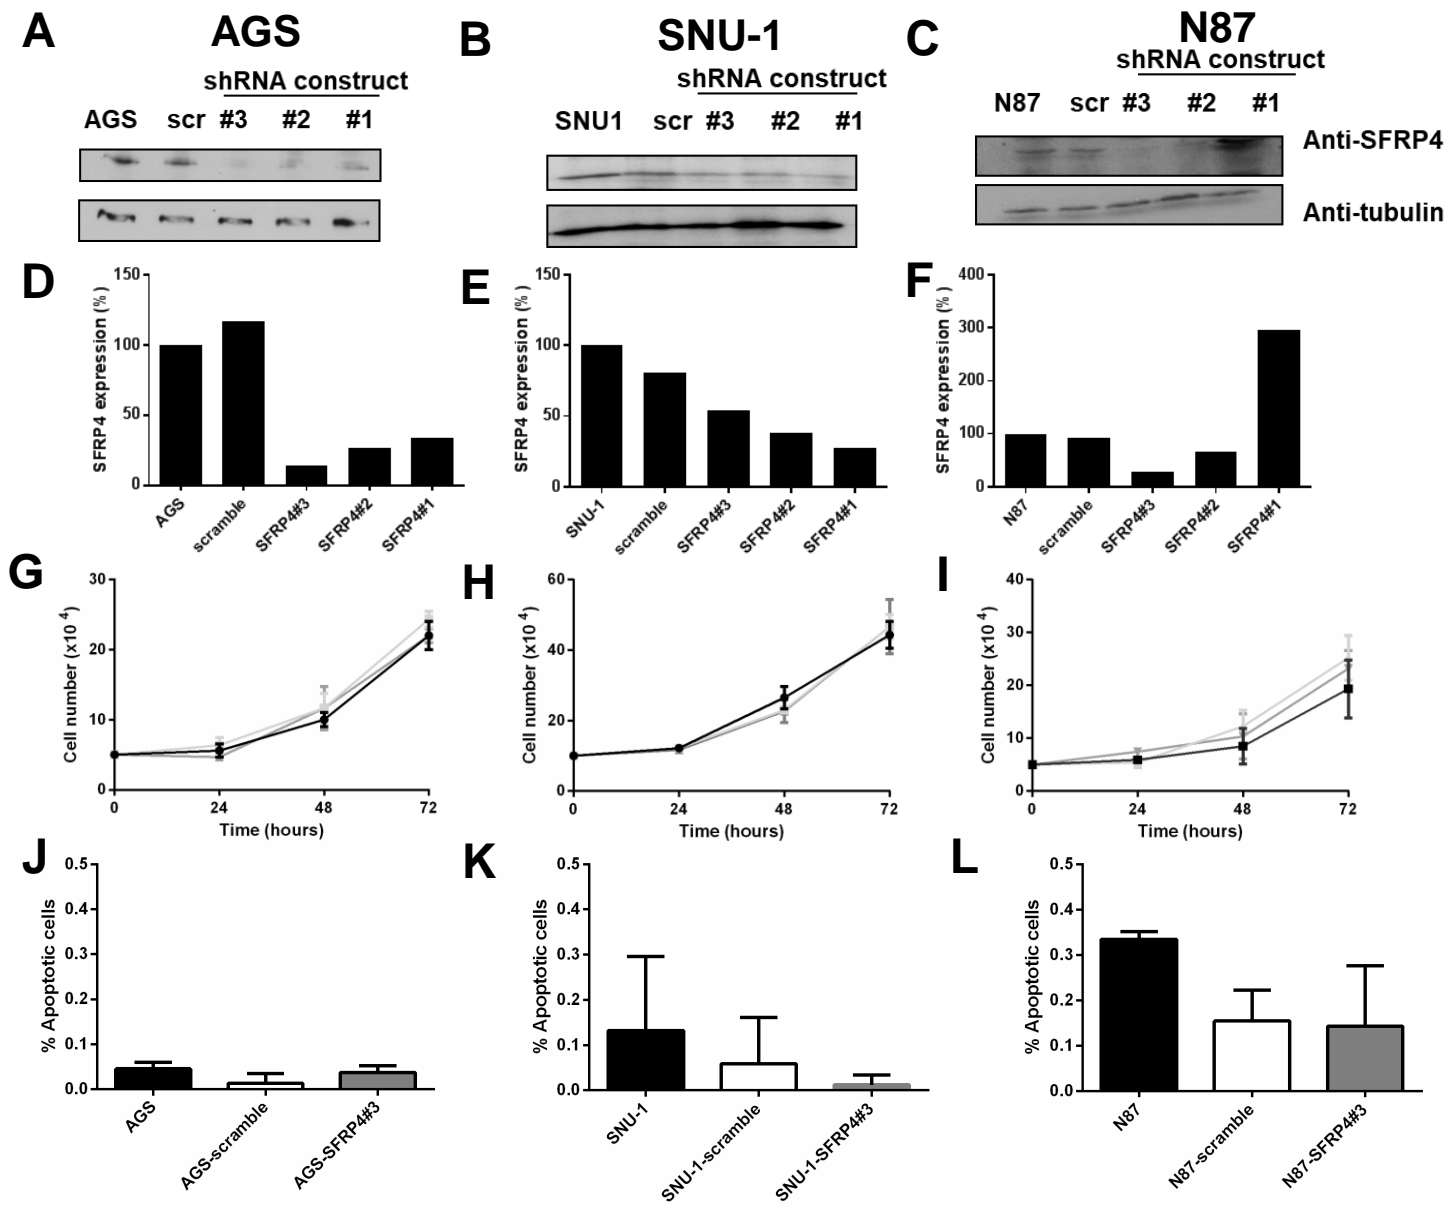

**Figure S2. Effects of shRNA mediated knockdown of SFRP4.** shRNA mediated knockdown of gastric cancer cell lines (A) AGS, (B) SNU-1 and (C) NCI-N87 was performed using the three available constructs targeting the SFRP4 gene (Supplementary Table S2) and a scramble control. Western blots were performed to confirm knockdown and the resulting immunoblots in (A-C) were quantitated by densitometric methods (D-F) using Image J. Overall construct #3 was the best performing and used for all subsequent experiments. Proliferation was determined by cell counts at 24, 48 and 72 hours (G-I) cell lines. No significant differences were observed in any of the cell lines. (J-L) Apoptosis was determined for the same cell lines using the Apoptaq kit. Representative images are shown in Fig. S3. Data are represented as mean  $\pm$  SD.

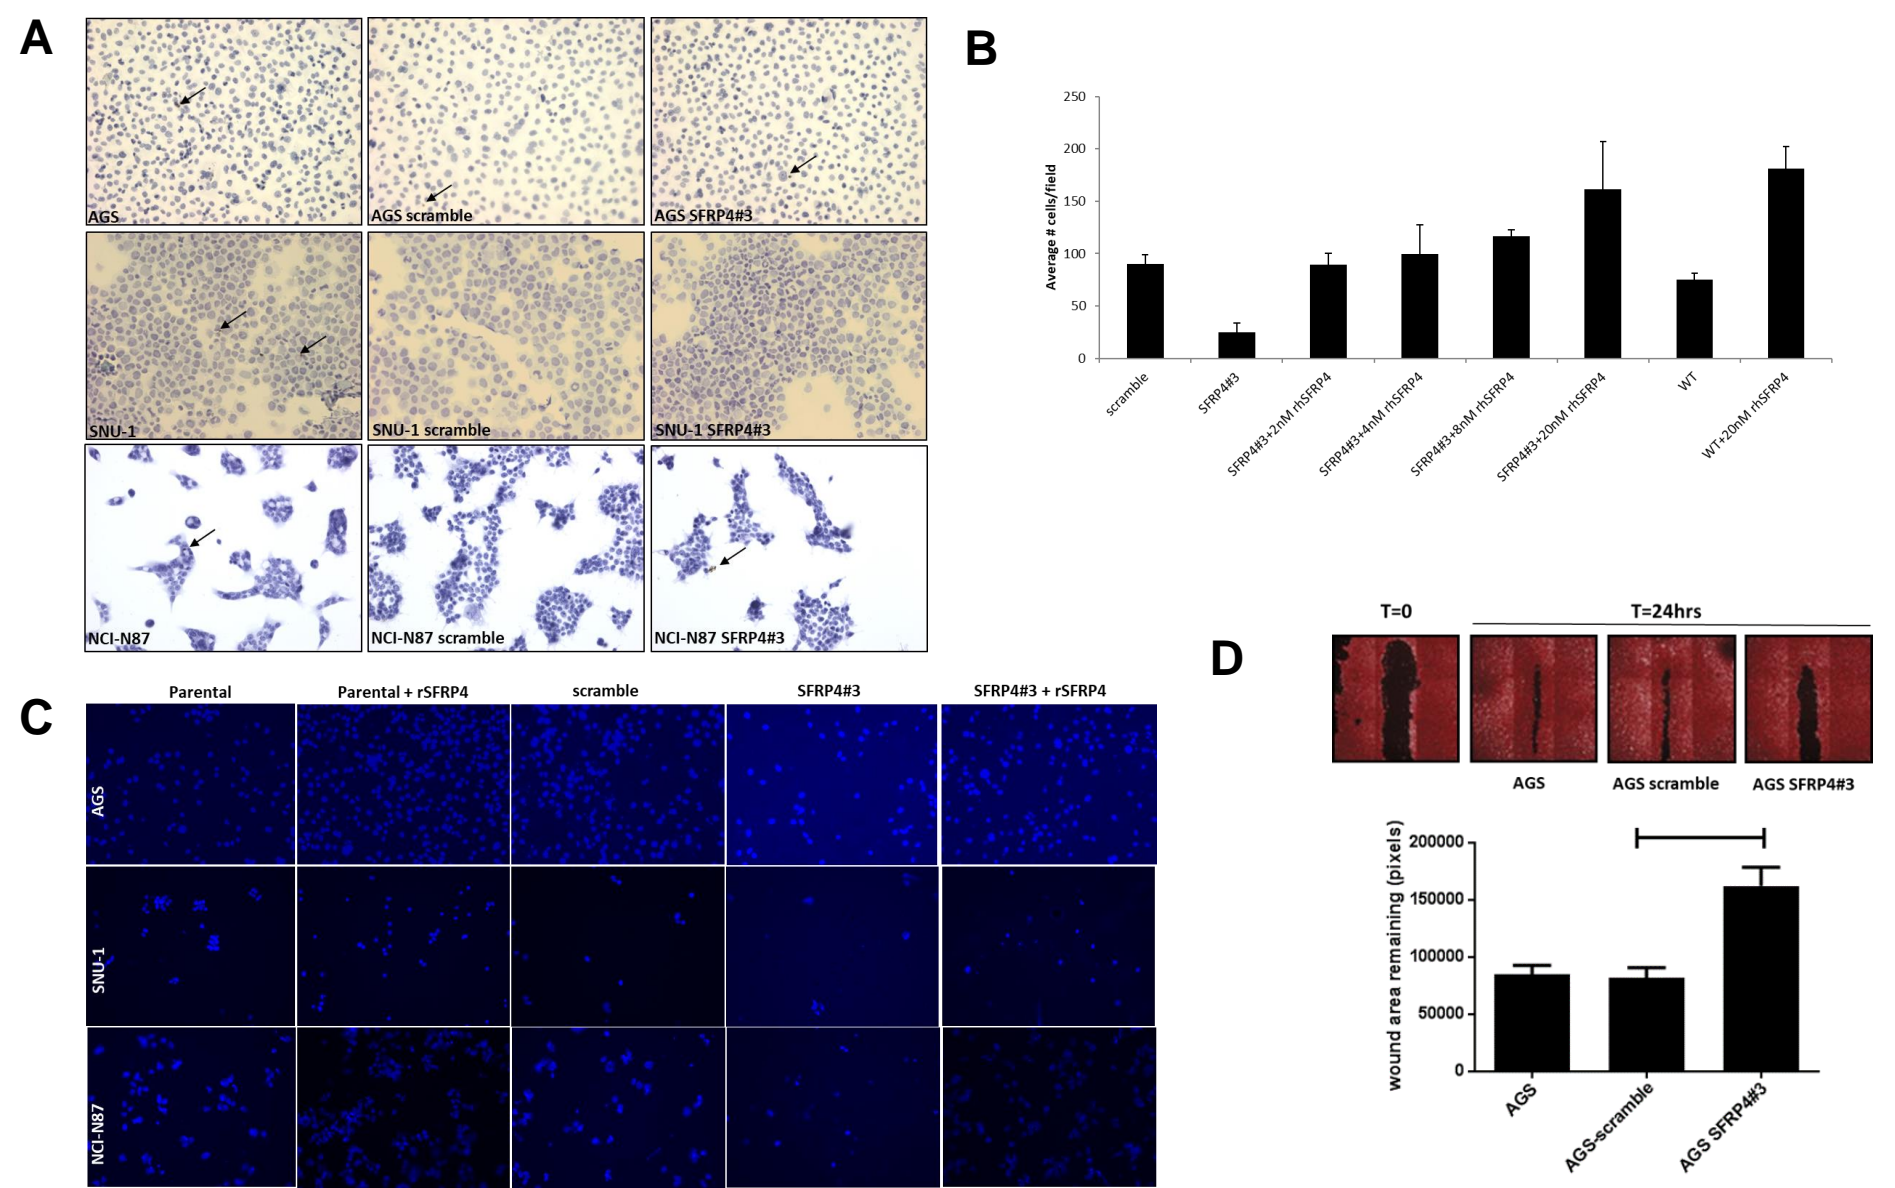

**Figure S3.** Outcomes of functional assays **(A)** representative images from apoptosis assays (arrows represent apoptotic cells), **(B)** the effect of the addition of recombinant human SFRP4 on the invasion of AGS cells. AGS WT or AGS-SFRP4 knockdown cells were pre-incubated with varying doses of rhSFRP4 before use in an invasion assay. Data are represented as mean  $\pm$  SD, **(C)** representative images of AGS, SNU-1 and NCI-N87 cells from invasion assays shown in Fig 3. **(D)** AGS wound healing assay. AGS WT, scramble and SFRP4 knockdown cells were seeded to confluency, scratched to wound and imaged at 0- and 24-hours. Wound healing was then quantitated \* $p=6.8 \times 10^{-3}$ ; t test. Data are represented as mean  $\pm$  SD.

Table S2: Genes correlated with SFRN4

| Australian dataset |               |            |               |          |               |              |               |          |               | TCGA dataset |               |            |               |             |               |             |               |  |  | Common genes |  |
|--------------------|---------------|------------|---------------|----------|---------------|--------------|---------------|----------|---------------|--------------|---------------|------------|---------------|-------------|---------------|-------------|---------------|--|--|--------------|--|
| Gene               | Pearson Score | Gene       | Pearson Score | Gene     | Pearson Score | Gene         | Pearson Score | Gene     | Pearson Score | Gene         | Pearson Score | Gene       | Pearson Score | Gene Symbol | Pearson Score | Gene Symbol | Pearson Score |  |  |              |  |
| ACTA2              | 0.71          | CNN1       | 0.60          | FAM20C   | 0.72          | ISM1         | 0.70          | M8AS     | 0.76          | PROS1        | 0.65          | STON1      | 0.78          | ADGRA2      | 0.61          | ADGRA2      | 0.61          |  |  |              |  |
| ACTN1              | 0.72          | CNRP1      | 0.65          | FAM229B  | 0.62          | ITGA1        | 0.60          | MRC2     | 0.78          | PRRX1        | 0.79          | SULF1      | 0.76          | AEBP1       | 0.67          | AEBP1       | 0.67          |  |  |              |  |
| ADAMTS2            | 0.62          | COL10A1    | 0.73          | FAP      | 0.81          | ITGB5        | 0.68          | MGRPRF   | 0.69          | PRSS23       | 0.65          | SVIL       | 0.67          | ANTXR1      | 0.69          | ANTXR1      | 0.69          |  |  |              |  |
| ADAMT1             | 0.64          | COL12A1    | 0.61          | FBLN1    | 0.68          | ITGBL1       | 0.90          | MVRL1    | 0.62          | PTGFR        | 0.62          | SYNC       | 0.74          | ASPN        | 0.66          | ASPN        | 0.66          |  |  |              |  |
| ADGRA2             | 0.63          | COL14A1    | 0.64          | FBLN2    | 0.75          | JAM3         | 0.73          | MSC-AS1  | 0.71          | PTGIS        | 0.71          | SYNDIG1    | 0.60          | AZIN2       | 0.63          | BGN         | 0.63          |  |  |              |  |
| ADGRD1             | 0.65          | COL16A1    | 0.65          | FBN1     | 0.84          | JAZF1        | 0.60          | M8R83    | 0.77          | PTGL         | 0.65          | SFT11      | 0.68          | BGN         | 0.68          | BK1C1       | 0.67          |  |  |              |  |
| AEBP1              | 0.63          | COL1A1     | 0.60          | FBLX7    | 0.68          | KANK2        | 0.63          | M8R47    | 0.76          | QKI          | 0.69          | TAGLN      | 0.72          | BK1C1       | 0.62          | C1R         | 0.62          |  |  |              |  |
| AKAP12             | 0.82          | COL3A1     | 0.75          | F8X032   | 0.71          | KATNAL1      | 0.65          | M8R48    | 0.80          | RAB23        | 0.72          | TBCEL      | 0.61          | C1QTNF5     | 0.61          | C1S         | 0.61          |  |  |              |  |
| AKT3               | 0.73          | COL5A1     | 0.72          | FERM1T2  | 0.74          | KCNK4        | 0.64          | MVH10    | 0.79          | RAB31        | 0.81          | TECAL7     | 0.63          | C1R         | 0.67          | CDH11       | 0.78          |  |  |              |  |
| ANKOTL1            | 0.74          | COL5A2     | 0.67          | FZT1     | 0.67          | KCNB9        | 0.63          | MPL9     | 0.68          | RAH4         | 0.68          | TC4        | 0.72          | C1S         | 0.64          | CNTN3       | 0.64          |  |  |              |  |
| ANGPT12            | 0.73          | COL6A1     | 0.61          | FGF7F3   | 0.63          | KCTD10       | 0.68          | MPLK     | 0.70          | RARRB2       | 0.71          | TENM4      | 0.70          | CDH11       | 0.78          | COL8A1      | 0.78          |  |  |              |  |
| ANKRD10            | 0.61          | COL6A2     | 0.78          | FGFR1    | 0.72          | KSLCC1       | 0.67          | KSLCN    | 0.66          | RGLI2        | 0.61          | TGFB11     | 0.71          | CNTN3       | 0.7           | CTHRC1      | 0.7           |  |  |              |  |
| ANGSI              | 0.77          | COL6A3     | 0.64          | FBN      | 0.66          | KAA1755      | 0.65          | NAP1L3   | 0.72          | RASFR8       | 0.74          | TGFR3      | 0.64          | COL8A1      | 0.73          | CDAC1       | 0.73          |  |  |              |  |
| ANTXR1             | 0.89          | COL8A1     | 0.92          | FRBP14   | 0.60          | KDIN5220     | 0.63          | NAV3     | 0.63          | RASSF8-AS1   | 0.60          | TGFR1      | 0.66          | CFZ         | 0.67          | DOK5        | 0.67          |  |  |              |  |
| ANKA6              | 0.66          | COL8A2     | 0.85          | FRBP7    | 0.73          | KF1B         | 0.64          | NDN      | 0.72          | RBFOS1       | 0.64          | THBS2      | 0.87          | CTHRC1      | 0.62          | ECM2        | 0.62          |  |  |              |  |
| ADC3               | 0.63          | COLLEC12   | 0.66          | FN1A     | 0.66          | KORREL1      | 0.74          | NEXN     | 0.67          | RBM51        | 0.66          | THBS3      | 0.75          | DAC11       | 0.66          | EFEMP2      | 0.66          |  |  |              |  |
| AP152              | 0.67          | COMP       | 0.66          | FMO1     | 0.60          | KLC1         | 0.68          | ND2      | 0.64          | RBM53        | 0.67          | THBS4      | 0.73          | DOX5        | 0.63          | ELN         | 0.63          |  |  |              |  |
| ARL10              | 0.63          | COPB8      | 0.61          | FN1      | 0.72          | KLHL29       | 0.66          | NSCH     | 0.61          | RCBTB2       | 0.61          | THY1       | 0.78          | ECM2        | 0.61          | FAM19A5     | 0.61          |  |  |              |  |
| ARMCK1             | 0.68          | COF22      | 0.80          | FND1C1   | 0.82          | LAMMA        | 0.68          | NMMT     | 0.61          | RECK         | 0.65          | TIMP1      | 0.75          | EFEMP2      | 0.6           | FAP         | 0.6           |  |  |              |  |
| ARMCK2             | 0.61          | COX7A1     | 0.69          | FOXF2    | 0.61          | LAMB2        | 0.68          | NOTCH2   | 0.71          | RERG         | 0.67          | TIMP2      | 0.83          | ELN         | 0.68          | FBN1        | 0.68          |  |  |              |  |
| ASPN               | 0.84          | CPXM2      | 0.78          | FRMO6    | 0.72          | LAMC1        | 0.65          | NOX4     | 0.65          | RFTN1        | 0.66          | TIMP3      | 0.73          | FAM19A5     | 0.62          | FND1C1      | 0.62          |  |  |              |  |
| ATL3               | 0.64          | CRPRLD1    | 0.81          | FSTL1    | 0.84          | LAPP6        | 0.64          | NEF1-J61 | 0.62          | RGL1         | 0.63          | TMEM173    | 0.61          | SAP         | 0.6           | FSTL1       | 0.6           |  |  |              |  |
| ATP10A             | 0.73          | CTC3       | 0.62          | FTD      | 0.61          | LATS2        | 0.64          | NREP     | 0.75          | ROXA         | 0.63          | TMEM43     | 0.67          | FBN1        | 0.63          | GFPT2       | 0.63          |  |  |              |  |
| ATP8B2             | 0.61          | CRYAB      | 0.66          | FUT11    | 0.71          | LAYN         | 0.70          | NRK      | 0.62          | RHOQ         | 0.62          | TMEM45A    | 0.62          | FND1C1      | 0.71          | GLI2        | 0.71          |  |  |              |  |
| ATXN1              | 0.63          | CSGALNACT2 | 0.75          | FXD6     | 0.65          | LBH          | 0.65          | NRP2     | 0.70          | RELPL1       | 0.64          | TMEM47     | 0.65          | FSTL1       | 0.61          | GLTB2       | 0.61          |  |  |              |  |
| BACE1              | 0.61          | CTHRC1     | 0.73          | FZD1     | 0.73          | LGALS1       | 0.72          | NRXN3    | 0.72          | RNMLB        | 0.62          | TNRCC2     | 0.60          | IGFBP7      | 0.6           | IGFBP7      | 0.6           |  |  |              |  |
| BGN                | 0.83          | CTSK       | 0.79          | GAL3ST4  | 0.64          | LHFPL6       | 0.71          | NTM      | 0.61          | RNF144A      | 0.73          | TNS1       | 0.71          | GGT5        | 0.64          | ISLR        | 0.64          |  |  |              |  |
| BHLHE22            | 0.65          | CYBB01     | 0.60          | GAS1     | 0.73          | LINC01279    | 0.73          | NUAK1    | 0.72          | RNF146       | 0.60          | TPM1       | 0.67          | GLI1        | 0.67          | ITGB1       | 0.67          |  |  |              |  |
| BK1C1              | 0.82          | CYP11B1    | 0.73          | GAS7     | 0.74          | LXN1         | 0.71          | OLFM1    | 0.62          | RNF150       | 0.66          | TPM2       | 0.70          | GLI2        | 0.64          | KAA1755     | 0.64          |  |  |              |  |
| BNP3               | 0.68          | CYP21L1    | 0.63          | GFPT2    | 0.71          | LOC101929122 | 0.65          | OLFM2B   | 0.74          | RNF117       | 0.75          | TRO        | 0.66          | GLTB2       | 0.63          | LOX1        | 0.63          |  |  |              |  |
| BN2                | 0.75          | DNAI2      | 0.67          | GJA1     | 0.62          | LOX          | 0.63          | OMD      | 0.67          | ROBO1        | 0.67          | TRPC1      | 0.71          | HIC1        | 0.63          | LRRK32      | 0.63          |  |  |              |  |
| BNP2               | 0.63          | DAC11      | 0.75          | GLI2     | 0.63          | LOX1         | 0.66          | PALD     | 0.74          | ROR2         | 0.69          | TRPS1      | 0.66          | HTRA3       | 0.63          | LTPB2       | 0.63          |  |  |              |  |
| BOC                | 0.76          | DCLK1      | 0.64          | GLI3     | 0.72          | LROH2        | 0.61          | PARO8B   | 0.62          | RSPO3        | 0.68          | TSO2       | 0.72          | IGFBP7      | 0.63          | LUM         | 0.63          |  |  |              |  |
| C14orf132          | 0.61          | DCLK2      | 0.61          | GLPR1    | 0.63          | LRP12        | 0.61          | PARVA    | 0.70          | RTN1         | 0.62          | TSO3       | 0.74          | IGFBP7-AS1  | 0.62          | MMP2        | 0.62          |  |  |              |  |
| C1orf126           | 0.60          | DCN        | 0.74          | GLI2     | 0.77          | LRRK32       | 0.69          | PRX3     | 0.63          | RUFY3        | 0.62          | TSPAN4     | 0.64          | ISLR        | 0.77          | MOXD1       | 0.77          |  |  |              |  |
| C1orf54            | 0.63          | DDR2       | 0.75          | GLTB2    | 0.79          | LRRN4CL      | 0.65          | PCOLCE   | 0.68          | RUNX1T1      | 0.80          | TSPAN9     | 0.65          | ISLR2       | 0.62          | MRC2        | 0.62          |  |  |              |  |
| C1QTNF3            | 0.63          | DIENND5A   | 0.68          | GNAL     | 0.63          | LSAMP        | 0.63          | PDE3A    | 0.64          | SIPR3        | 0.64          | TUB        | 0.62          | ITGA11      | 0.62          | M8R48       | 0.62          |  |  |              |  |
| C1R                | 0.78          | DPP1       | 0.68          | GNB4     | 0.74          | LTPB1        | 0.69          | PDGFC    | 0.67          | SAMDA4       | 0.61          | TUBA1A     | 0.78          | ITGB1       | 0.76          | NALCN       | 0.76          |  |  |              |  |
| C1S                | 0.77          | DPP3       | 0.61          | GNK5     | 0.63          | LTPB2        | 0.78          | PDGFRB   | 0.74          | SCARF2       | 0.64          | TUBB8      | 0.68          | KAA1755     | 0.65          | NOX4        | 0.65          |  |  |              |  |
| C3                 | 0.62          | DREK1      | 0.68          | GNK6     | 0.75          | LTPB3        | 0.75          | POGFR    | 0.76          | SCRG1        | 0.65          | THSD7      | 0.63          | LOX1        | 0.64          | NREP        | 0.64          |  |  |              |  |
| C6orf3             | 0.65          | DNAH3D5    | 0.70          | GRM1     | 0.75          | LUM          | 0.79          | POLM2    | 0.62          | SOC2         | 0.69          | THSD1      | 0.60          | LRRK32      | 0.72          | OLFM2B      | 0.72          |  |  |              |  |
| C9orf88            | 0.60          | DOCK11     | 0.67          | GLUCY1A3 | 0.74          | MACF1        | 0.63          | POLM3    | 0.75          | SELENOM      | 0.69          | UBE2E2     | 0.72          | LTPB2       | 0.71          | OMD         | 0.71          |  |  |              |  |
| CALD1              | 0.82          | DOK5       | 0.67          | GLUCY1B3 | 0.74          | MAF8         | 0.66          | POLM4    | 0.63          | SERPINE2     | 0.66          | UBE2Q2     | 0.63          | LUM         | 0.71          | POGFR8      | 0.71          |  |  |              |  |
| CAUHM2             | 0.75          | DPSL3      | 0.85          | GXYL2    | 0.77          | MAGO-AS3     | 0.71          | POZRN3   | 0.69          | SERPINF1     | 0.80          | VAT1       | 0.64          | LZT51       | 0.61          | PLXDC2      | 0.61          |  |  |              |  |
| CAUHM5             | 0.71          | DSE        | 0.73          | HDSFL3   | 0.76          | MAN1C1       | 0.65          | PEAL5    | 0.77          | SERPINF1     | 0.75          | VCAN       | 0.79          | MMP2        | 0.63          | SCARF2      | 0.63          |  |  |              |  |
| CAMSAP2            | 0.63          | DZP1       | 0.69          | HECTD2   | 0.68          | MAP1A        | 0.68          | PEAK1    | 0.62          | SETP1        | 0.61          | VEGFC      | 0.61          | MOXD1       | 0.74          | SERPINF1    | 0.74          |  |  |              |  |
| CAP2               | 0.64          | ECM2       | 0.75          | HEG1     | 0.75          | MAP1B        | 0.66          | PEI3     | 0.62          | SFRP2        | 0.74          | VGLL3      | 0.70          | SPARC       | 0.63          | SPARC       | 0.63          |  |  |              |  |
| CARMN              | 0.63          | EDNRA      | 0.69          | HEY1     | 0.65          | MAP3K20      | 0.66          | PHLDA3   | 0.64          | SGCD         | 0.67          | VIM        | 0.68          | M8R48       | 0.71          | THSD2       | 0.71          |  |  |              |  |
| CAVIN1             | 0.79          | EFEMP1     | 0.67          | HMCN1    | 0.81          | MAP3K3       | 0.67          | PHLDB2   | 0.63          | SGCE         | 0.68          | VSTM4      | 0.66          | NALCN       | 0.7           | THY1        | 0.7           |  |  |              |  |
| CAVIN3             | 0.61          | EFEMP2     | 0.85          | HDOK3    | 0.65          | MAP4         | 0.65          | PKD2     | 0.78          | SH3PKD2A     | 0.63          | WISP1      | 0.69          | NOX4        | 0.74          | TIMP2       | 0.74          |  |  |              |  |
| CCDC80             | 0.78          | EFS        | 0.65          | HDXB2    | 0.62          | MARVELD1     | 0.74          | PLAGL1   | 0.62          | SH3PKD2B     | 0.64          | WWTR1      | 0.70          | NREP        | 0.68          | VCAN        | 0.68          |  |  |              |  |
| CD109              | 0.61          | EID1       | 0.62          | HSD11B1  | 0.64          | MDRC         | 0.63          | PLPFR4   | 0.62          | SH3RF3       | 0.61          | ZBTB20     | 0.60          | OLFM2B      | 0.63          | VEGFC       | 0.63          |  |  |              |  |
| CDCA7BP3           | 0.65          | ELN        | 0.71          | HSPB2    | 0.65          | MEIS1        | 0.65          | SLC3A3   | 0.60          | SLC3A3       | 0.70          | ZBTB4      | 0.61          | OMD         | 0.61          | WFS21       | 0.61          |  |  |              |  |
| CDH11              | 0.87          | EMILN1     | 0.72          | HTRA1    | 0.62          | MEIOX2       | 0.65          | PLXDC2   | 0.84          | SLIT2        | 0.73          | ZCCHC24    | 0.75          | POGFR       | 0.66          | PLXDC2      | 0.66          |  |  |              |  |
| CDK14              | 0.63          | EMIL1      | 0.69          | IFIT1    | 0.63          | MFAP2        | 0.66          | SMOCC2   | 0.74          | ZEB1         | 0.74          | ZEB1       | 0.74          | PLXDC2      | 0.67          | PLXDC2      | 0.67          |  |  |              |  |
| CD01               | 0.61          | ENDX1      | 0.61          | IGFBP4   | 0.66          | MFAP5        | 0.66          | PODN     | 0.67          | SOCS5        | 0.74          | ZHK3       | 0.64          | SCARF2      | 0.66          | SCARF2      | 0.66          |  |  |              |  |
| CDON               | 0.61          | EPDR1      | 0.63          | IGFBP6   | 0.67          | MGP          | 0.77          | PRDM2    | 0.63          | SPARC        | 0.83          | ZFPK2      | 0.74          | SERPINF1    | 0.65          | SERPINF1    | 0.65          |  |  |              |  |
| CHRD1              | 0.60          | EPHA3      | 0.66          | IGFBP7   | 0.72          | MIR100HG     | 0.74          | PRDM6    | 0.65          | SPARCL1      | 0.64          | ZNF35      | 0.68          | SPARC       | 0.63          | SPARC       | 0.63          |  |  |              |  |
| CLEC11A            | 0.73          | EVC        | 0.83          | IL17RD   | 0.62          | MIR99AHG     | 0.67          | PRELP    | 0.75          | SPART        | 0.65          | ZNF423     | 0.73          | THSD2       | 0.7           | THSD2       | 0.7           |  |  |              |  |
| CLIC4              | 0.74          | EVC2       | 0.61          | IL1K1    | 0.60          | MMP2         | 0.74          | PRICKLE1 | 0.69          | SPN1         | 0.65          | ZNF436     | 0.73          | THY1        | 0.6           | THY1        | 0.6           |  |  |              |  |
| CLIP3              | 0.62          | FAM198A    | 0.62          | INHBA    | 0.73          | MN1          | 0.76          | PRICKLE2 | 0.61          | SPOCK1       | 0.85          | ZNF521     | 0.66          | TIMP2       | 0.65          | TIMP2       | 0.65          |  |  |              |  |
| CLP4               | 0.63          | FAM198B    | 0.75          | INHAT    | 0.66          | MORF4L1      | 0.65          | PRKD1    | 0.76          | SPON1        | 0.66          | ZNF532     | 0.63          | VCAN        | 0.61          | VCAN        | 0.61          |  |  |              |  |
| CLMP               | 0.66          | FAM19A5    | 0.69          | IRF2BP1  | 0.67          | MOXD1        | 0.82          | PRNG1    | 0.64          | SPN          | 0.74          | ZNF667-AS1 | 0.61          | VEGFC       | 0.6           | VEGFC       | 0.6           |  |  |              |  |
| CMT3               | 0.75          | FAM208A    | 0.66          | ISLR     | 0.87          | MPDZ         | 0.74          | PRNP     | 0.61          | STGALNACS    | 0.63          | ZNF521     | 0.6           | ZNF521      | 0.6           | ZNF521      | 0.6           |  |  |              |  |

**A**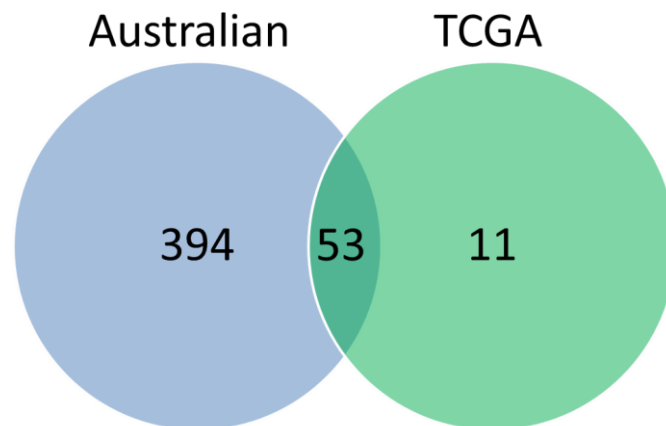**B**

| Pathway name                                                                                                                | Entities |       |          |          | Reactions |          |
|-----------------------------------------------------------------------------------------------------------------------------|----------|-------|----------|----------|-----------|----------|
|                                                                                                                             | found    | ratio | p-value  | FDR      | found     | ratio    |
| Extracellular matrix organisation                                                                                           | 14/329   | 0.023 | 1.07E-09 | 3.63e-07 | 77/318    | 0.025    |
| Regulation of Insulin-like Growth Factor (IGF) transport and uptake by Insulin-like Growth Factor Binding Proteins (IGFBPs) | 9/127    | 0.009 | 1.85e-08 | 3.14e-06 | 9/14      | 0.001    |
| Elastic fibre formation                                                                                                     | 6/46     | 0.003 | 1.49e-06 | 1.68e-05 | 12/17     | 0.001    |
| Post-translational protei phosphorylation                                                                                   | 7/109    | 0.008 | 1.48e-06 | 1.11e-04 | 1/1       | 8.01e-05 |
| Molecules associated with elastic fibres                                                                                    | 5/38     | 0.003 | 1.64e-06 | 1.11e-04 | 5/10      | 8.01e-04 |
| ECM proteoglycans                                                                                                           | 5/79     | 0.005 | 5.42e-05 | 0.003    | 5/23      | 0.002    |
| Diseases associated with glycosaminoglycan metabolism                                                                       | 4/55     | 0.004 | 1.86e-04 | 0.009    | 12/29     | 0.002    |
| Degradation of extracellular matrix                                                                                         | 5/148    | 0.01  | 9.55e-04 | 0.026    | 34/105    | 0.008    |

**Figure S4. Genes and pathways correlated with SFRP4.** (A) Genes commonly expressed in the Australian and TCGA cohorts were identified (Pearson correlation >0.6). (B) Top 8 functional pathways found to be enriched after further analysis of these genes using Reactome.

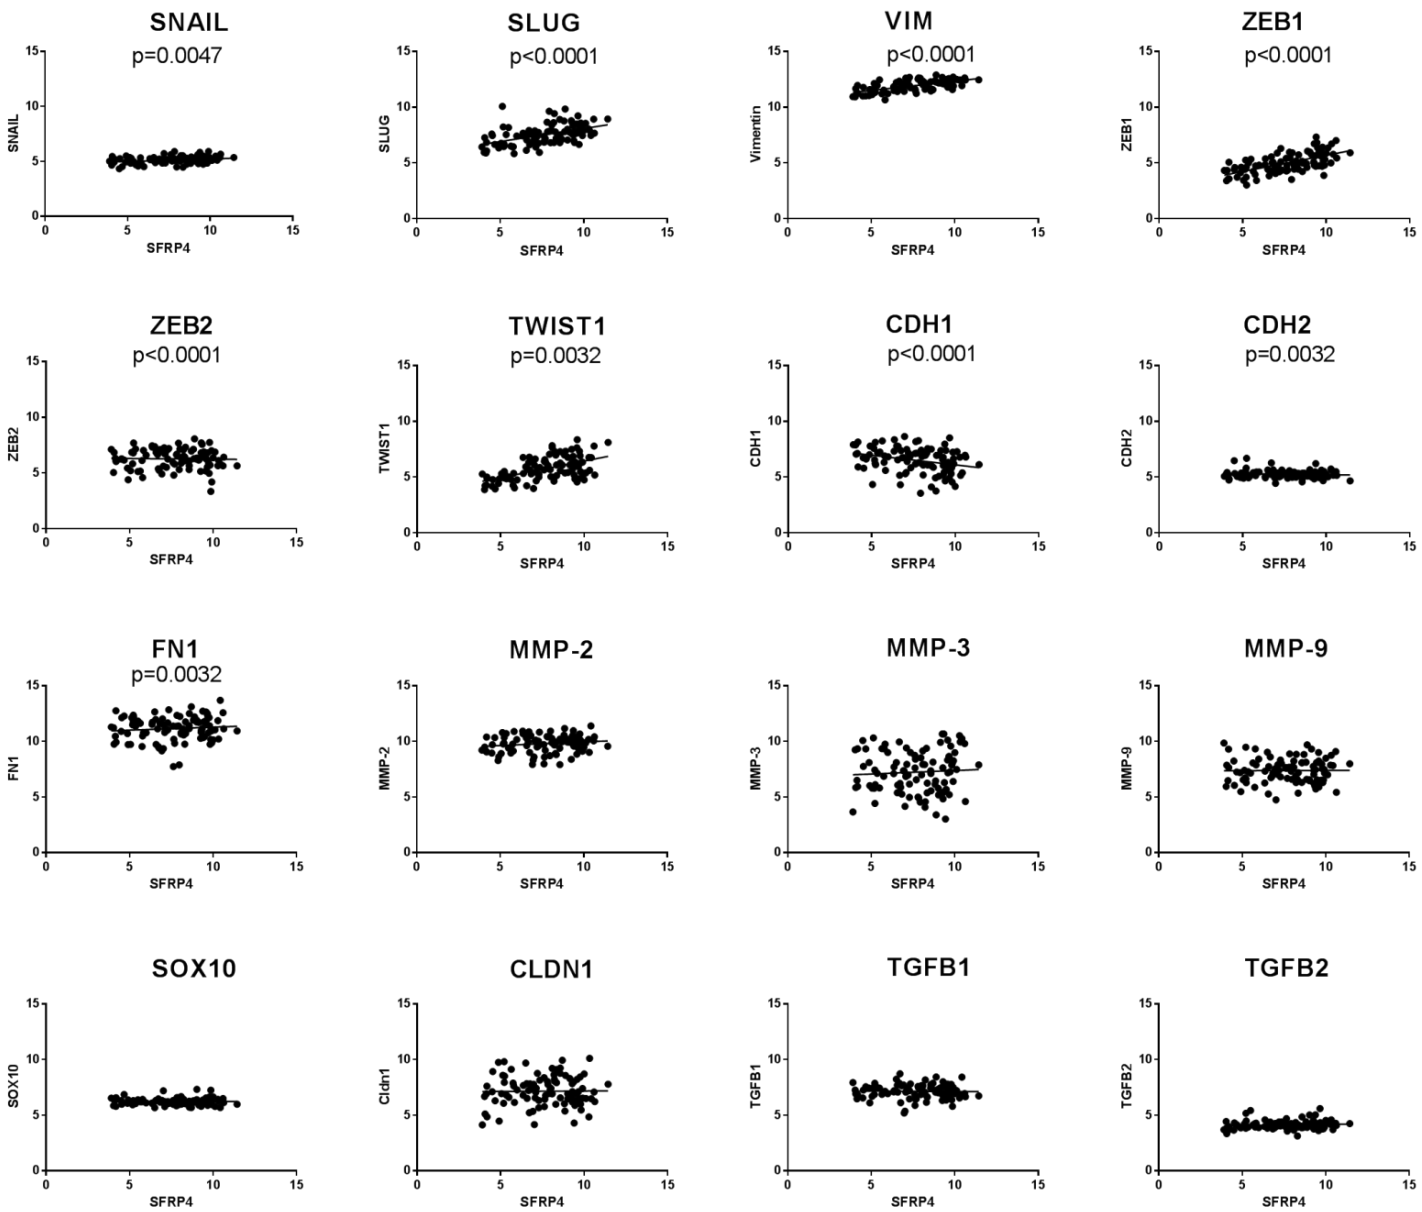

**Figure S5. Correlation of SFRP4 expression with EMT related genes.** Affymetrix U133 plus 2 mRNA data from the Australian dataset was used to correlate expression of SFRP4 with key EMT related genes



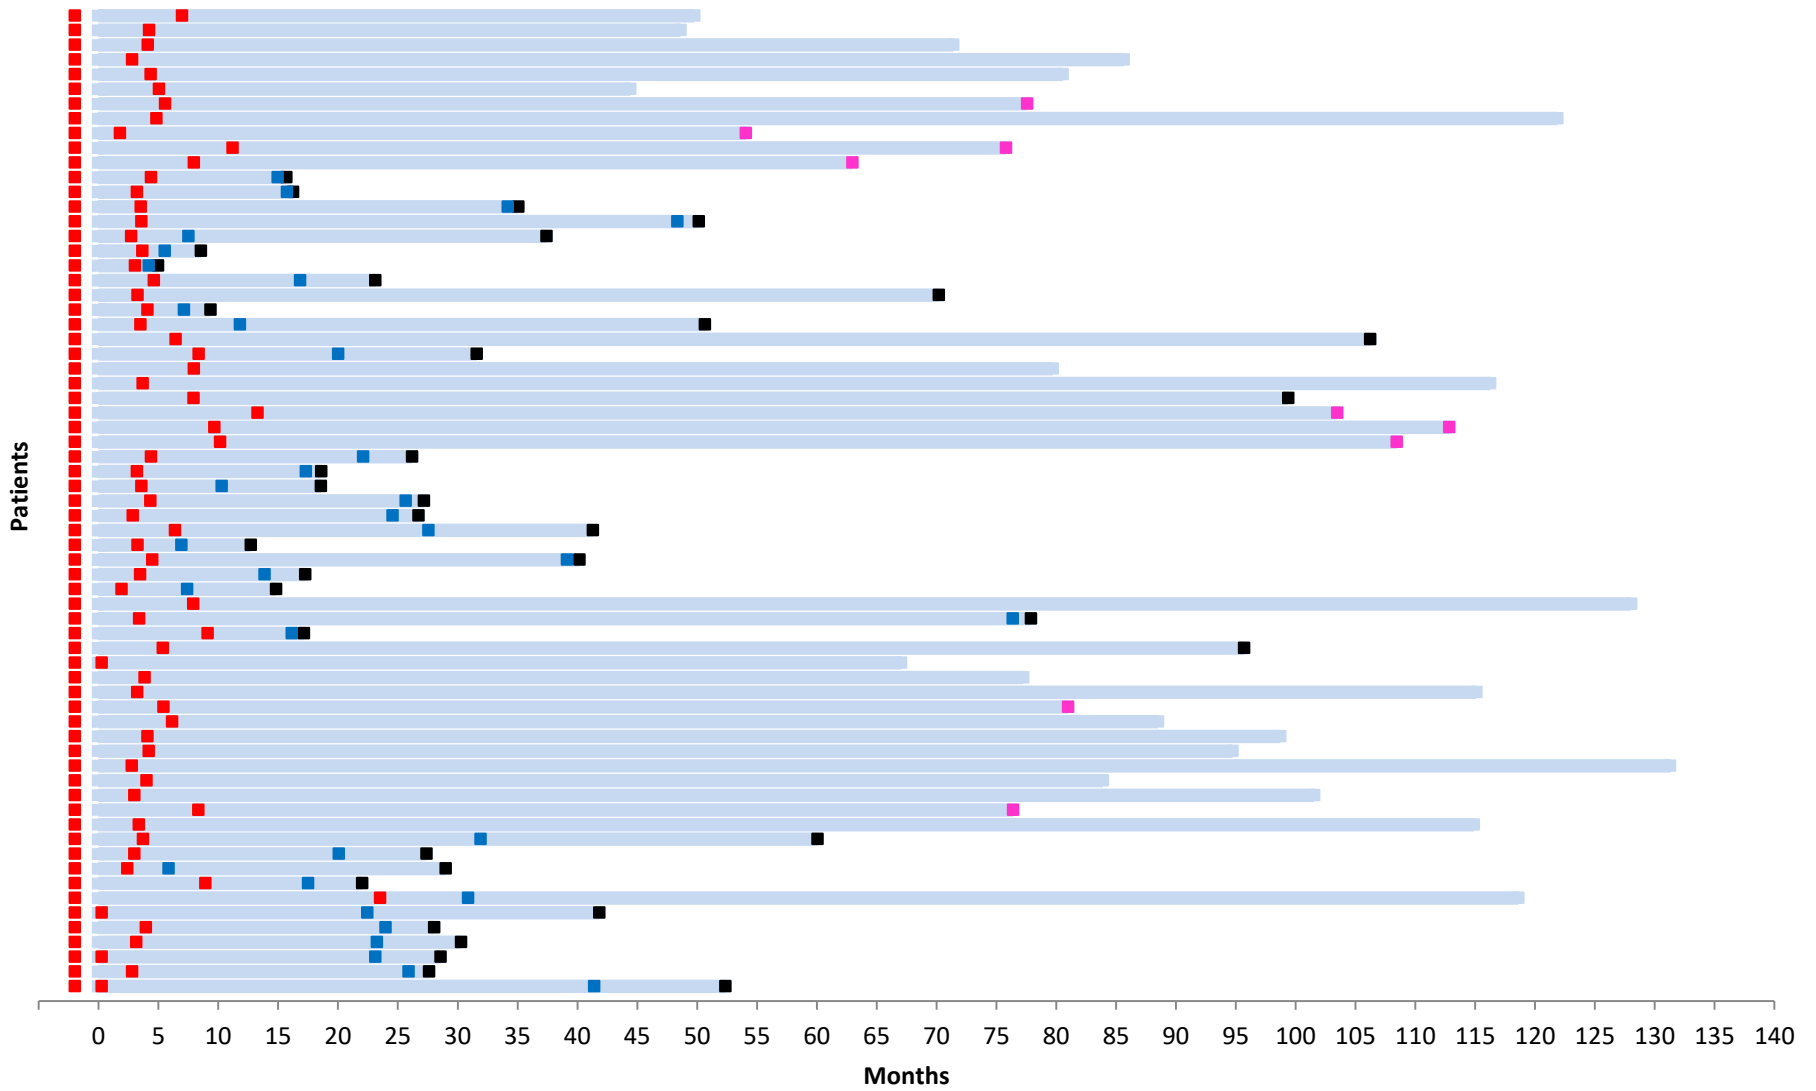

**Figure S6. Swimmer plots outlining timelines for sample collection, recurrence and patient prognosis in the Australian cohort (n= 67).** Zero months indicates the date of surgery. Key: Red= plasma sample collections; blue= time of clinically documented recurrence; black = overall survival; pink =lost to follow up
